# Supplementary material
Source: PubMed Central journal article supplement (PMC3157257)
Supplement: mmc4.pdf [file mmc4.pdf]

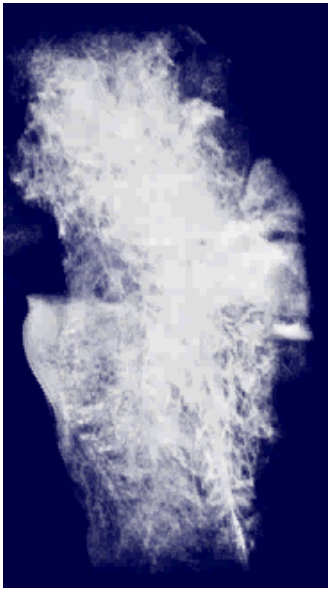

***Supplemental Figure S4.***

**3D volume rendered image of the high signal intensity regions of normal FVB F1 mouse pancreas.** The tree-like structure seen in the normal pancreas most likely represents networks of ducts, blood vessels and stromal components. Characterization of the contribution of each component to this network will be the subject of our future investigations.
